# Supplementary material
Source: PubMed Central journal article supplement (PMC7252434)
Supplement: NIHMS1581619-supplement-Supplemental_Figure_1.pdf [file NIHMS1581619-supplement-Supplemental_Figure_1.pdf]

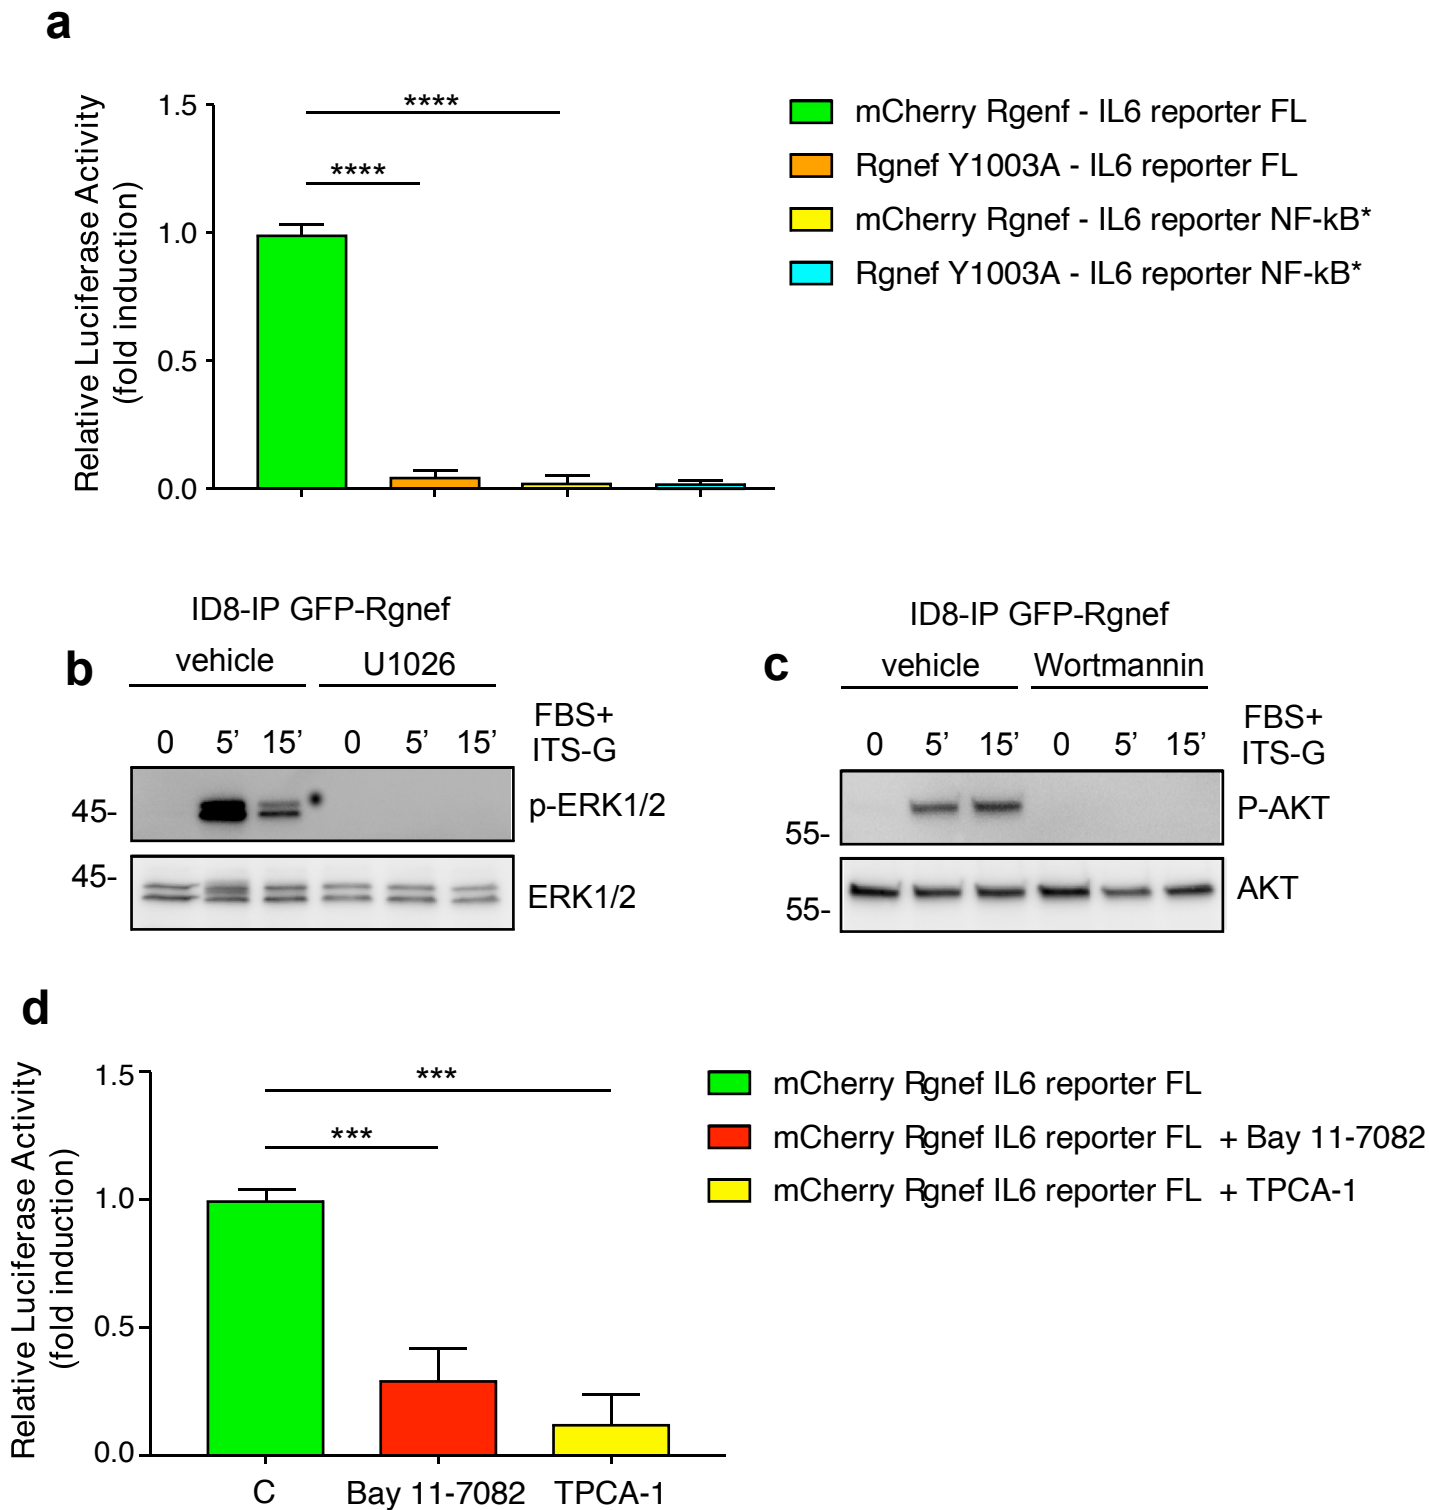

**Supplemental Figure S1.** Rgenf signaling and NF- $\kappa$ B reporter activation. (a) Human 293T transfection with mCherry-tagged Rgenf wildtype, Rgenf Y1003A (GDP exchange defective) and an IL-6 luciferase reporter with or without mutated NF- $\kappa$ B binding sites. (b and c) Adherent ID8-IP GFP-Rgenf cells were serum starved overnight, pre-treated with DMSO (vehicle), 10  $\mu$ M U0126, or 1  $\mu$ M wortmannin for 2h, and then stimulated with 5% fetal bovine serum plus 5% insulin-transferrin-selenium supplement for the indicated times prior to cell lysis. (b) Immunoblotting for phosphorylated ERK1/2 (T185/Y187) or total ERK1/2. (c) Immunoblotting for phosphorylated Akt (S473) or total Akt. (d) Human 293T cells were transfected as above and incubated with 10  $\mu$ M Bay 11-7082 or 10  $\mu$ M TPCA-1 for 24 h prior to analysis of luciferase activity. (a and d) Mean luciferase values are normalized from three independent analyses (\*\* P < 0.001 and \*\*\*\* P < 0.0001, unpaired T test).
